# Supplementary material for: Ultrafast time-resolved quantum cascade laser diagnostic for revealing the role of surface formate species in the photocatalytic oxidation of methanol
Source: Royal Society of Chemistry journal article supplement (doi:10.1039/d0cy00865f), 2020-01-01
Supplement: d0cy00865f1.pdf [file d0cy00865f1.pdf]

## Ultrafast time-resolved quantum cascade laser diagnostic for enlightening the role of surface formate species in the photocatalytic oxidation of methanol

Josefine Schnee,\* Marco Daturi, and Mohamad El-Roz,\*

Normandie Université, ENSICAEN, UNICAEN, CNRS, Laboratoire Catalyse et Spectrochimie, 14000 Caen, France.

\*Corresponding authors. E-mail addresses: josefine.schnee@sorbonne-universite.fr, josischnee@hotmail.com, mohamad.elroz@ensicaen.fr.

### Supplementary Information

- Full *operando* FT-IR spectra at steady state of TiO<sub>2</sub> P25, CA and HA upon photooxidation of methanol at 25 °C and atmospheric pressure (under a reaction flow of 30 mL/min containing 0.1 vol.% of methanol and 20 vol.% of oxygen in argon).

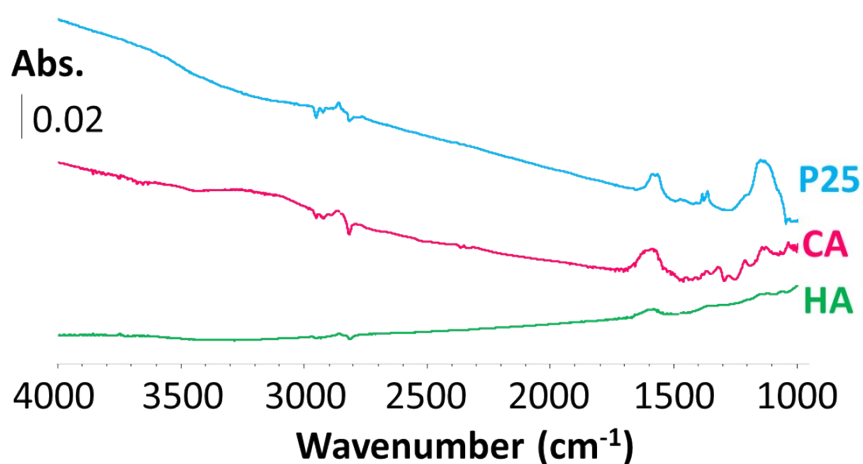

**Figure S1.** Full *operando* FT-IR spectra at steady state of TiO<sub>2</sub> P25, TiO<sub>2</sub> CA and TiO<sub>2</sub> HA upon photooxidation of methanol at 25 °C and atmospheric pressure, shown after subtraction of the initial spectrum recorded after dehydration pre-treatment under flowing methanol before UV irradiation. Conditions: flow = 30 mL/min; 0.1 and 20 vol.% of methanol and oxygen in argon, respectively; Hg-Xe lamp (200 W) filtered at  $\lambda = 365$  nm;  $I_{0(365\text{nm})} \approx 15$  mW/cm<sup>2</sup>. “Abs.” means absorbance, and is expressed in arbitrary units.

- FT-IR spectra of TiO<sub>2</sub> P25 before and during UV irradiation at 25 °C under a flow of 20 vol.% oxygen in argon (no methanol).

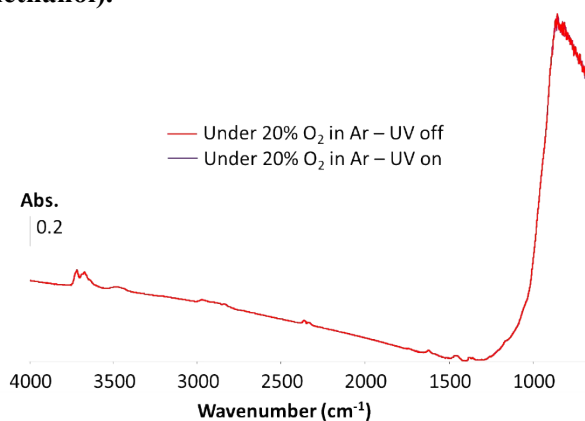

**Figure S2.** FT-IR spectra of TiO<sub>2</sub> P25 before and during UV irradiation at 25 °C and atmospheric pressure under a flow of 20 vol.% oxygen in argon without methanol. Conditions: flow = 30 mL/min; Hg-Xe lamp (200 W);  $I_0 \approx 200$  mW/cm<sup>2</sup>. “Abs.” means absorbance, and is expressed in arbitrary units.

- QCL beam amplitude at 1360 cm<sup>-1</sup> over TiO<sub>2</sub> P25 at 25 °C under reaction flow (methanol + oxygen/argon) without UV irradiation.

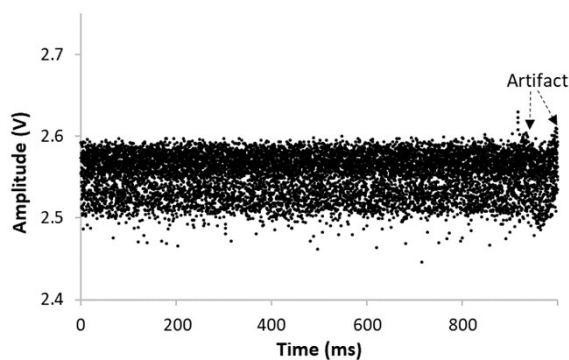

**Figure S3.** QCL beam amplitude at 1360 cm<sup>-1</sup> vs time over TiO<sub>2</sub> P25 under reaction flow at 25 °C and atmospheric pressure without UV irradiation. Conditions: flow = 30 mL/min; 0.1 and 20 vol.% of methanol and oxygen in argon, respectively.

- QCL signal at  $1360\text{ cm}^{-1}$  vs time over  $\text{TiO}_2$  P25 in 3 repetitions of the UV on-off cycle under reaction flow at  $25\text{ }^\circ\text{C}$ .

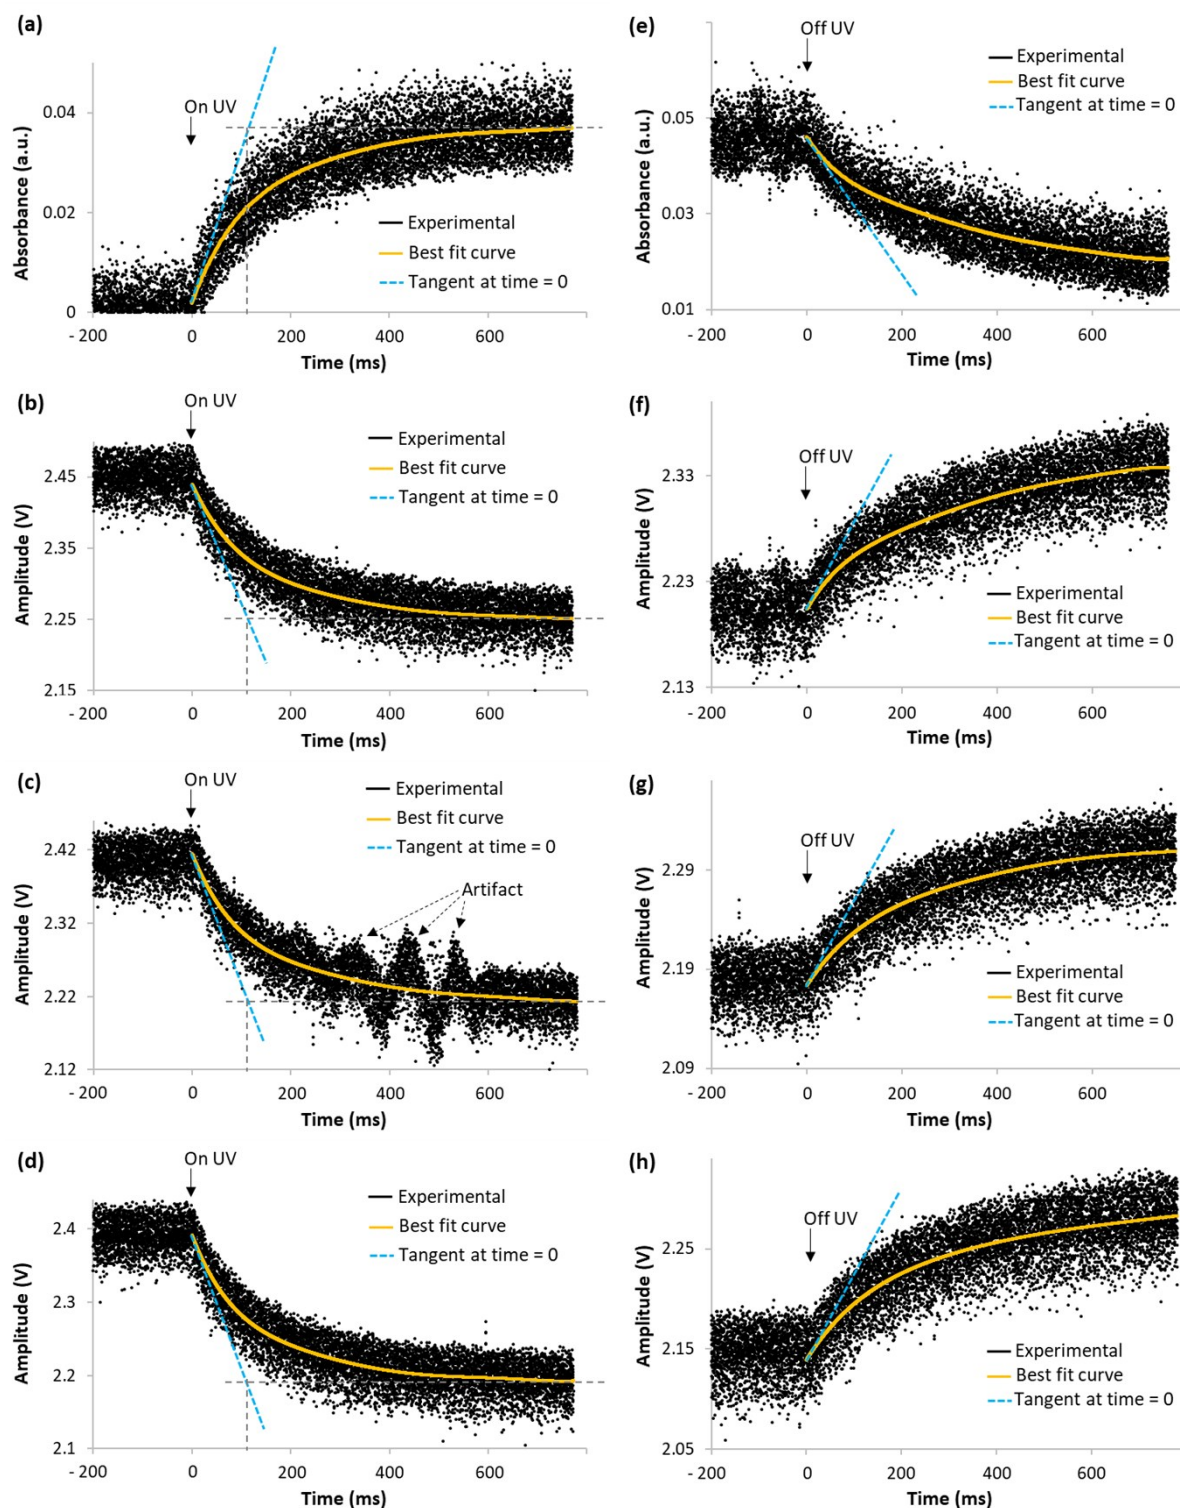

**Figure S4.** QCL signal at  $1360\text{ cm}^{-1}$  vs time over  $\text{TiO}_2$  P25 during repeated UV on-off cycles (UV on: a-b-c-d, UV off: e-f-g-h; two panels on the same horizontal line forming one UV on-off cycle) under reaction flow at  $25\text{ }^\circ\text{C}$  and atmospheric pressure. (a) and (e) show the same UV on-off cycle as (b) and (f), but with a y axis expressed in absorbance instead of amplitude. Conditions: flow =  $30\text{ mL/min}$ ; 0.1 and 20 vol.% of methanol and oxygen in argon, respectively; Hg-Xe lamp ( $200\text{ W}$ );  $I_0 \approx 200\text{ mW/cm}^2$ . In (a-b-c-d), time = 0 corresponds to the moment when the shutter in-between the lamp and the UV-light guide directed to the IR cell was opened to irradiate the sample. During the preceding 200 ms, the sample was already under reaction flow but still in the dark. In (e-f-g-h), time = 0 corresponds to the moment when the shutter was closed again, still under reaction flow. The times to open and close the shutter were around 6.5 ms and 3.2 ms, respectively.

- QCL signal at  $1360\text{ cm}^{-1}$  vs time over  $\text{TiO}_2$  CA in 3 repetitions of the UV on-off cycle under reaction flow at  $25\text{ }^\circ\text{C}$ .

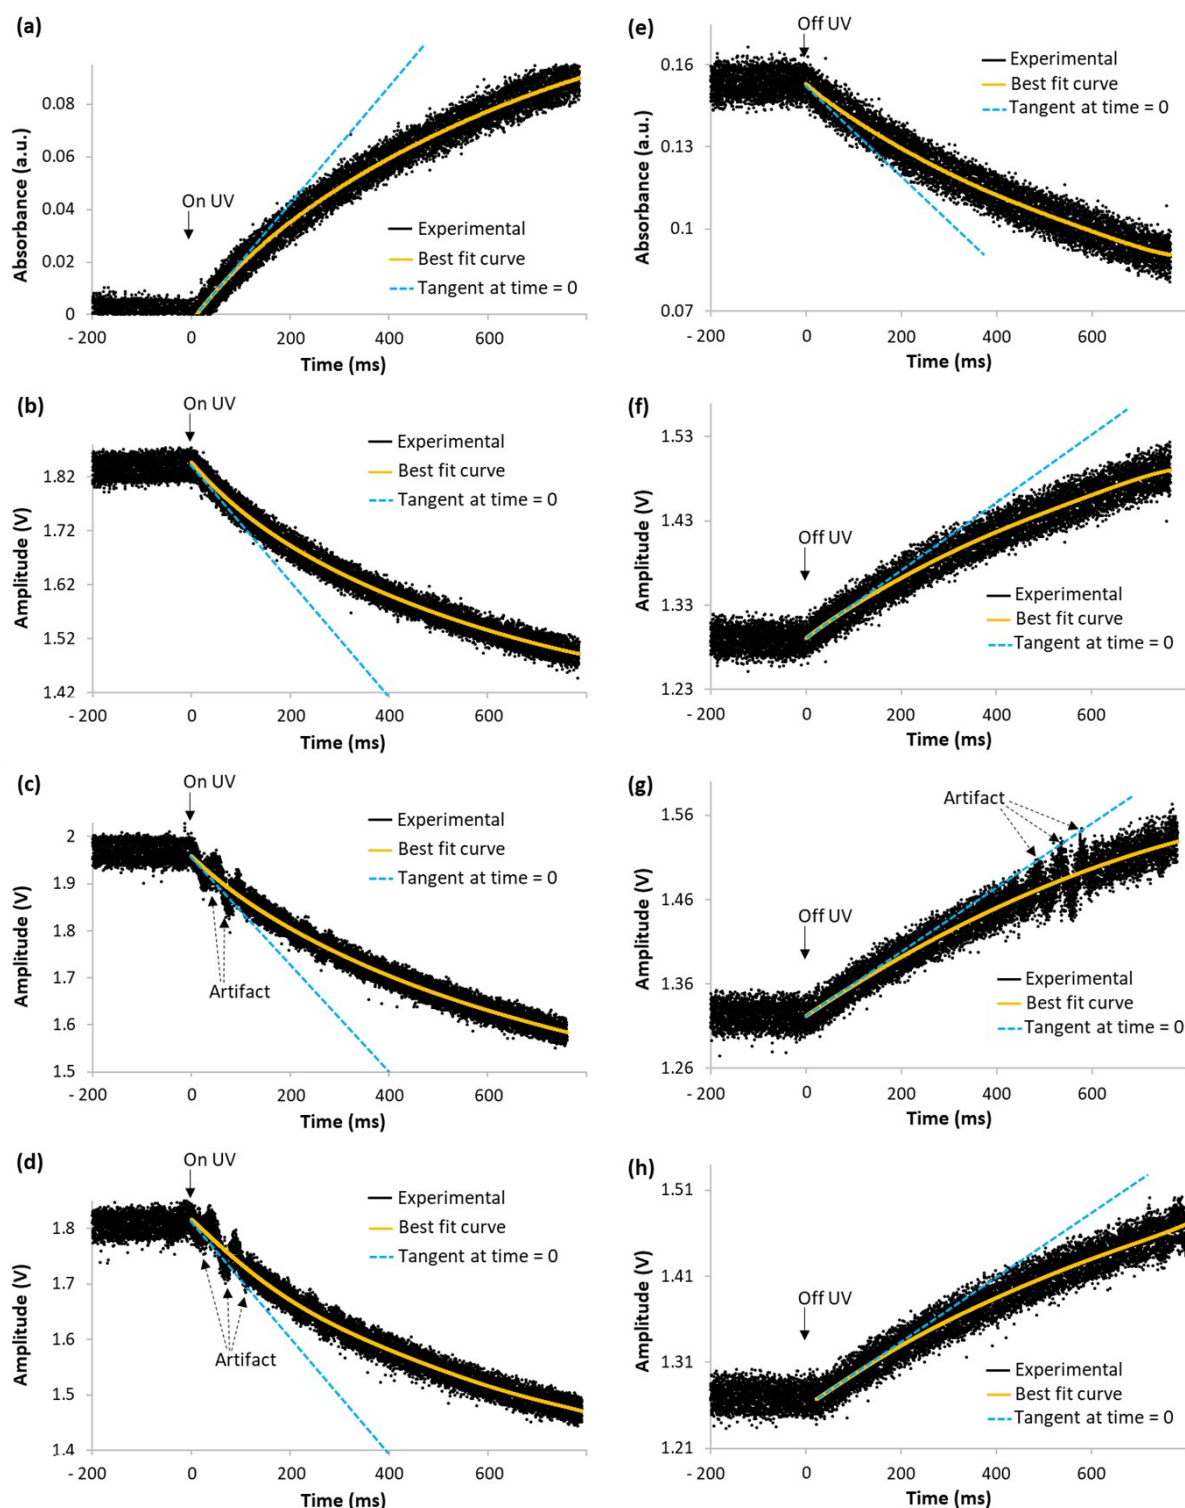

**Figure S5.** QCL signal at  $1360\text{ cm}^{-1}$  vs time over  $\text{TiO}_2$  CA during repeated UV on-off cycles (UV on: a-b-c-d, UV off: e-f-g-h; two panels on the same horizontal line forming one UV on-off cycle) under reaction flow at  $25\text{ }^\circ\text{C}$  and atmospheric pressure. (a) and (e) show the same UV on-off cycle as (b) and (f), but with a y axis expressed in absorbance instead of amplitude. Conditions: flow =  $30\text{ mL/min}$ ; 0.1 and 20 vol.% of methanol and oxygen in argon, respectively; Hg-Xe lamp ( $200\text{ W}$ );  $I_0 \approx 200\text{ mW/cm}^2$ . In (a-b-c-d), time = 0 corresponds to the moment when the shutter in-between the lamp and the UV-light guide directed to the IR cell was opened to irradiate the sample. During the preceding 200 ms, the sample was already under reaction flow but still in the dark. In (e-f-g-h), time = 0 corresponds to the moment when the shutter was closed again, still under reaction flow. The times to open and close the shutter were around 6.5 ms and 3.2 ms, respectively.

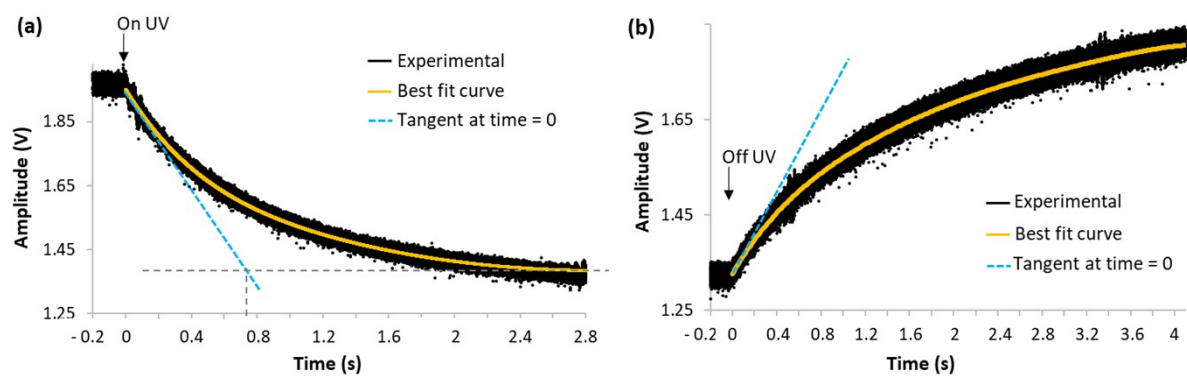

**Figure S6.** Same UV on(a)-off(b) cycle as shown on Figure S5 (c and g, respectively), but over a longer time scale.



- QCL signal at  $1360\text{ cm}^{-1}$  vs time over  $\text{TiO}_2$  HA in 3 repetitions of the UV on-off cycle under reaction flow at  $25\text{ }^\circ\text{C}$ .

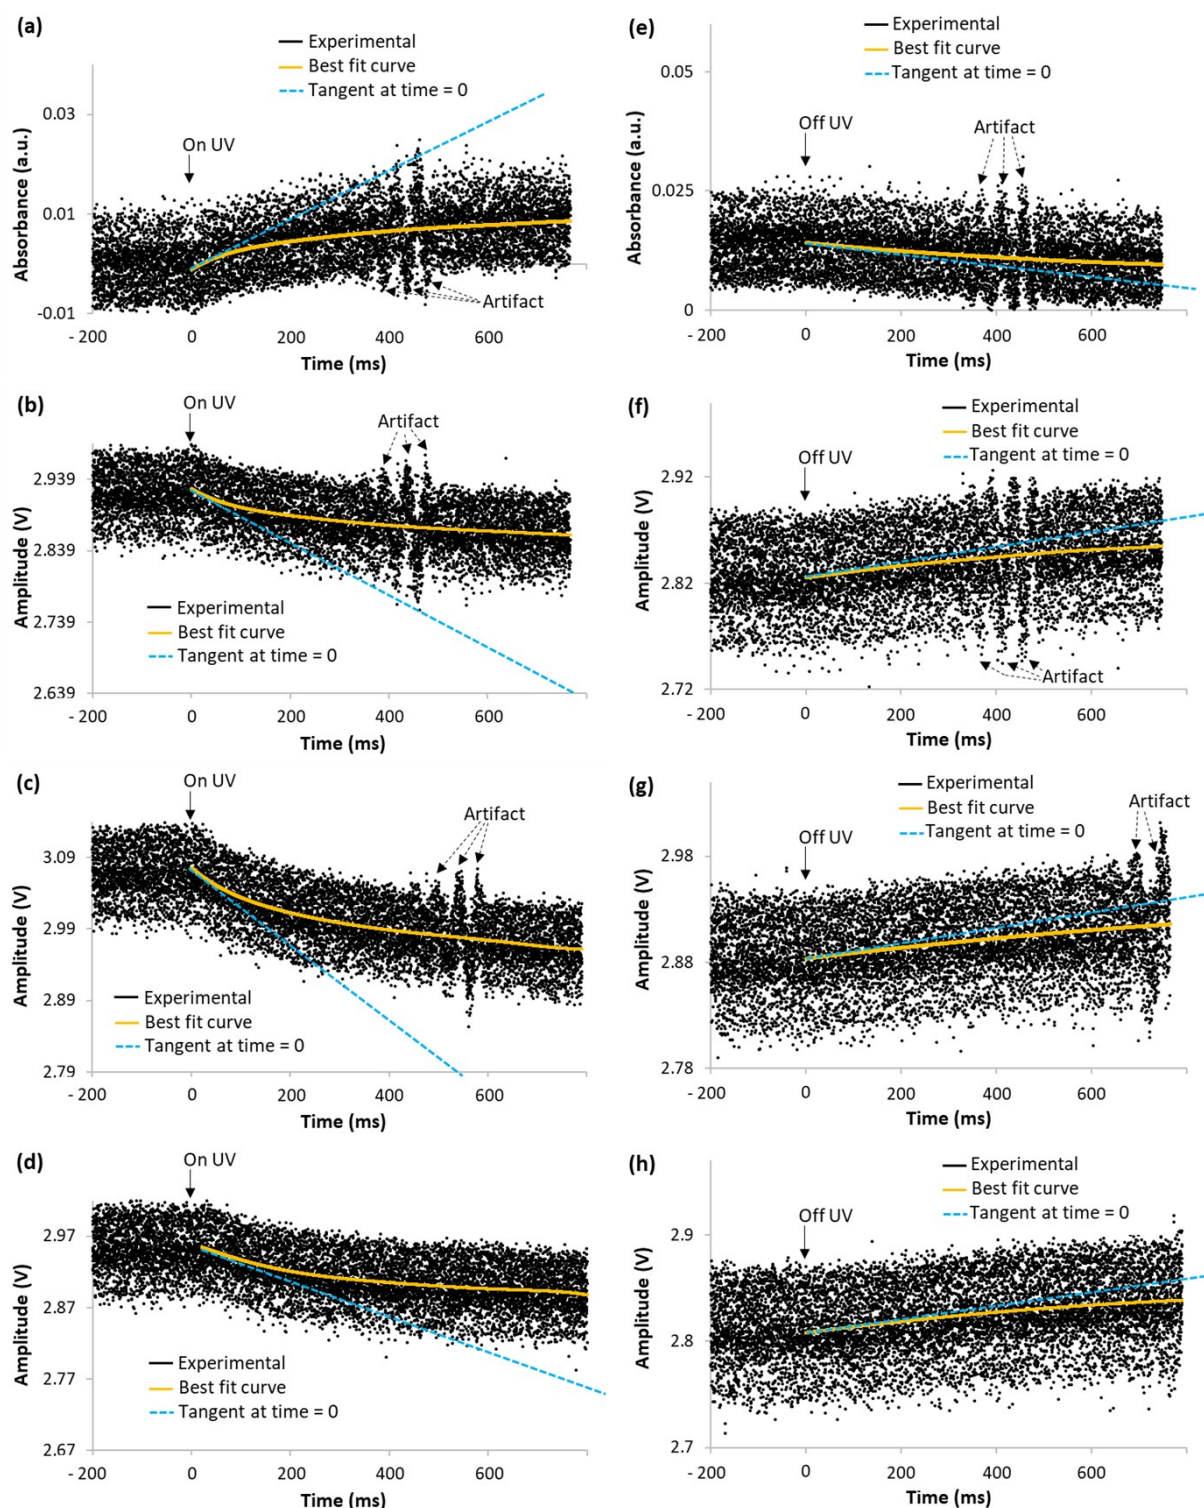

**Figure S7.** QCL signal at  $1360\text{ cm}^{-1}$  vs time over  $\text{TiO}_2$  HA during repeated UV on-off cycles (UV on: a-b-c-d, UV off: e-f-g-h; two panels on the same horizontal line forming one UV on-off cycle) under reaction flow at  $25\text{ }^\circ\text{C}$  and atmospheric pressure. (a) and (e) show the same UV on-off cycle as (b) and (f), but with a y axis expressed in absorbance instead of amplitude. Conditions: flow =  $30\text{ mL/min}$ ; 0.1 and 20 vol.% of methanol and oxygen in argon, respectively; Hg-Xe lamp ( $200\text{ W}$ );  $I_0 \approx 200\text{ mW/cm}^2$ . In (a-b-c-d), time = 0 corresponds to the moment when the shutter in-between the lamp and the UV-light guide directed to the IR cell was opened to irradiate the sample. During the preceding 200 ms, the sample was already under reaction flow but still in the dark. In (e-f-g-h), time = 0 corresponds to the moment when the shutter was closed again, still under reaction flow. The times to open and close the shutter were around 6.5 ms and 3.2 ms, respectively.

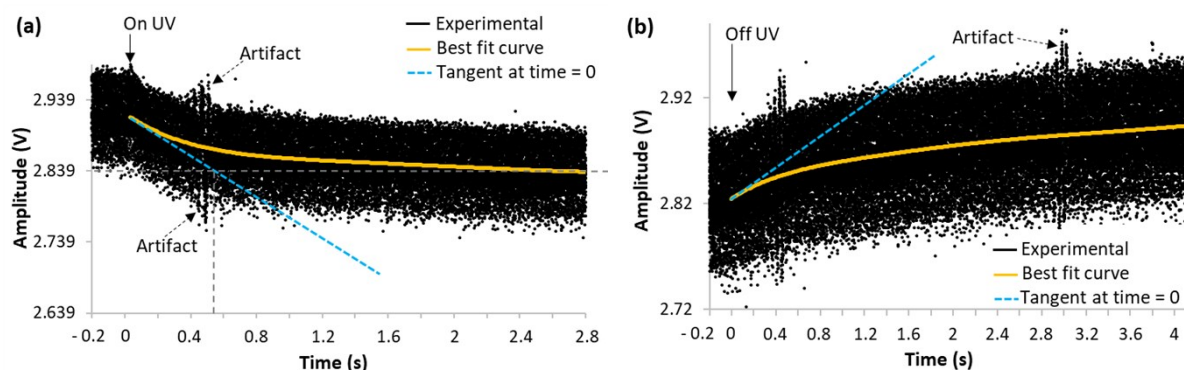

**Figure S8.** Same UV on(a)-off(b) cycle as shown on Figure S7 (b and f, respectively), but over a longer time scale.

- QCL beam absorbance at  $1360\text{ cm}^{-1}$  vs time over  $\text{TiO}_2$  P25 under reaction flow at  $25\text{ }^\circ\text{C}$ , in the UV off period following an UV on period of 300 ms vs 5 s.

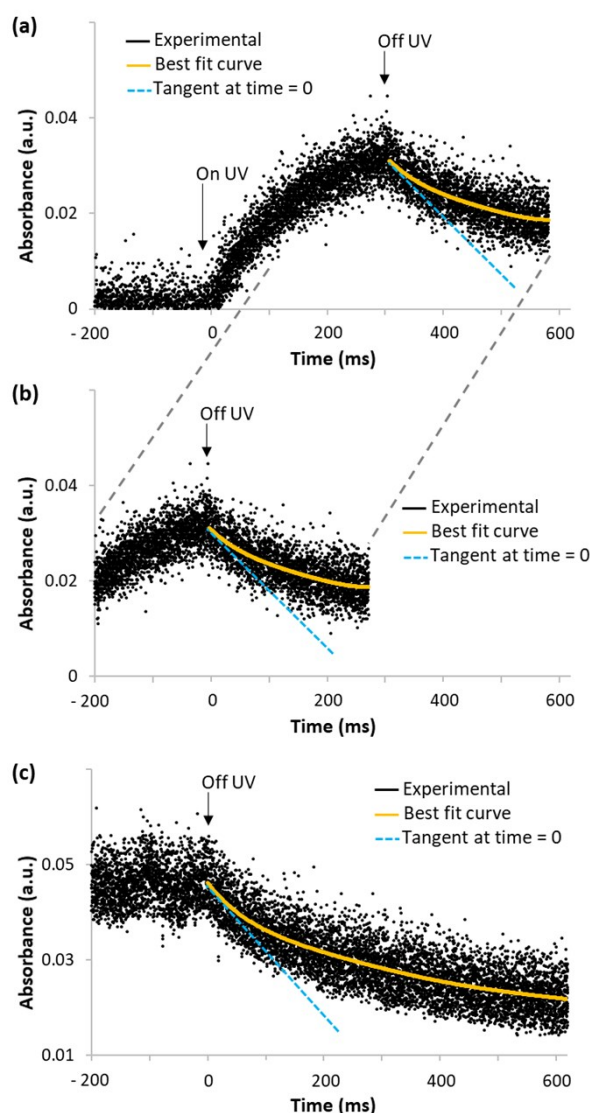

**Figure S9.** QCL beam absorbance at  $1360\text{ cm}^{-1}$  vs time over  $\text{TiO}_2$  P25 under reaction flow at  $25\text{ }^\circ\text{C}$  and atmospheric pressure during (a-b) a UV on-off cycle with on and off periods of 300 ms and (c) the same UV off cycle as shown on Figure S3e, i.e. after a UV on period of 5 s. Conditions: flow = 30 mL/min; 0.1 and 20 vol.% of methanol and oxygen in argon, respectively; Hg-Xe lamp (200 W);  $I_0 \approx 200\text{ mW/cm}^2$ . In (a), time = 0 corresponds to the moment when the shutter in-between the lamp and the

UV-light guide directed to the IR cell was opened to irradiate the sample. During the preceding 200 ms, the sample was already under reaction flow but still in the dark. In (b-c), time = 0 corresponds to the moment when the shutter was closed again, still under reaction flow. The times to open and close the shutter were around 6.5 ms and 3.2 ms, respectively. Extracted  $R_{app,r}$  values are 0.12 in (b) vs 0.15 in (c).

- QCL beam absorbance at 1360 and 1310  $\text{cm}^{-1}$  vs time over  $\text{TiO}_2$  P25 getting UV-irradiated under flowing methanol at 25 °C in the absence vs presence of oxygen.

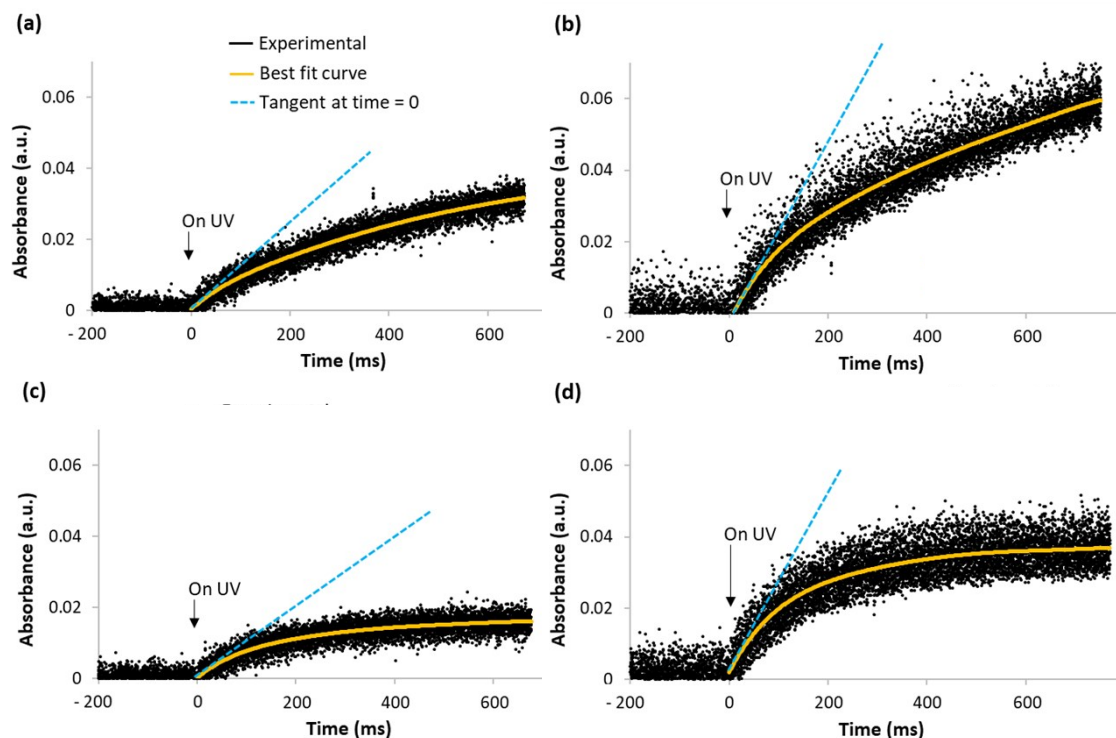

**Figure S10.** QCL beam absorbance at 1310  $\text{cm}^{-1}$  (a and c) and 1360  $\text{cm}^{-1}$  (b and d) vs time over  $\text{TiO}_2$  P25 getting UV-irradiated under flowing methanol at 25 °C and atmospheric pressure in the absence (a-b) or presence (c-d) of oxygen. Conditions: flow = 30 mL/min; 0.1 vol.% of methanol in argon, with 20 vol.% of oxygen if present; Hg-Xe lamp (200 W);  $I_0 \approx 200 \text{ mW/cm}^2$ . Time = 0 corresponds to the moment when the shutter in-between the lamp and the UV-light guide directed to the IR cell was opened to irradiate the sample. During the preceding 200 ms, the sample was already under flowing methanol (without oxygen in a-b, with oxygen in c-d) but still in the dark. The time to open the shutter was around 6.5 ms.
